# Supplementary material for: Monitoring liquid transport and chemical composition in lab on a chip systems using ion sensitive FET devices
Source: Royal Society of Chemistry journal article supplement (doi:10.1039/b604815c), 2006-01-01
Supplement: b604815c.pdf [file b604815c.pdf]

# Monitoring Liquid Transport and Chemical Composition in Lab on a Chip Systems using Ion Sensitive FET Devices

## Electronic Supplementary Information

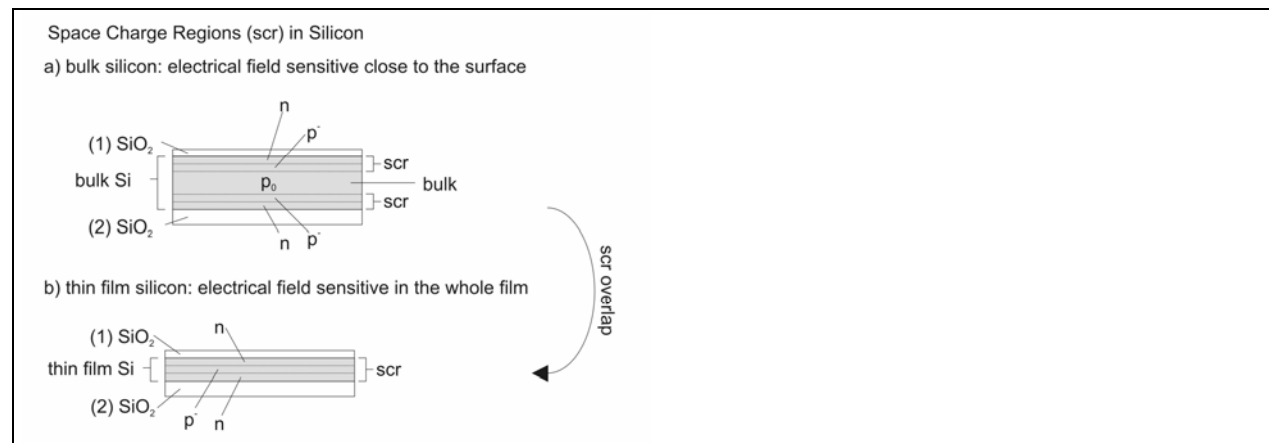

**Fig. 1** Space Charge Regions (scr) of p-doped Silicon. a) The charge carrier distribution of bulk silicon. b) The charge carrier distribution of the silicon thin film used in this work. n indicates inversion regions where electrons are the majority charge carriers, p' indicates depletion regions where holes are the majority charge carriers but of a lower concentration than in the bulk and  $p_0$  indicates the bulk region where the concentration of holes is given by the dopant concentration  $p_0$ . In the silicon thin film the scr as the electrical field sensitive region penetrates the whole thin film.

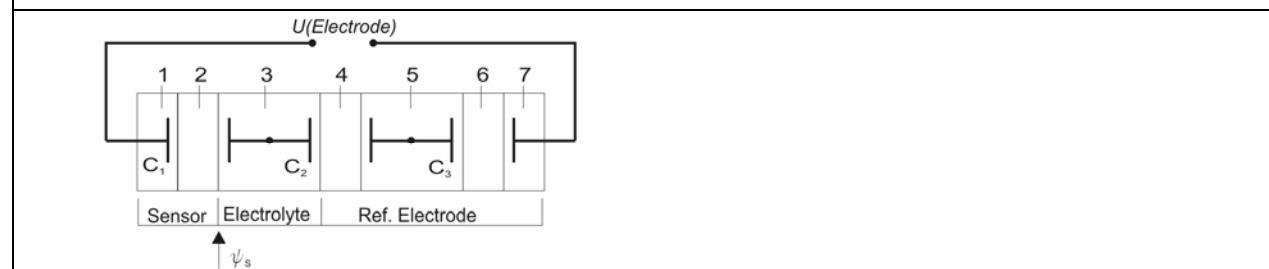

**Fig. 2** Capacitances at Material Junctions. The reference electrode potential  $U(\text{Electrode})$  is applied between the thin film (1) and the silver wire of the reference electrode (7) to three capacitors in series:  $C_1$ ,  $C_2$ ,  $C_3$ .  $C_1$  is given by the thin film, the electrolyte and the native oxide as the dielectric.  $C_2$  is given by the electrolyte, the electrolyte inside of the reference electrode and the porous membrane of the reference electrode as the dielectric.  $C_3$  is given by the the electrolyte inside of the reference electrode, the silver wire of the reference electrode and silver chloride salt as the dielectric. At each capacitor a significant voltage drop may occur. The surface potential  $\Psi_s$  is measured at the native oxide/ electrolyte interface.

**Table 1** materials and equipment

| Description                                             | Company                                           |
|---------------------------------------------------------|---------------------------------------------------|
| SOI wafer (SIMOX)                                       | Siltronic Japan Corp., Osaka, Japan               |
| ultrasonic cleaner (USC300D)                            | VWR International GmbH, Darmstadt, Germany        |
| hotplate (810 Digital)                                  | VWR International GmbH, Darmstadt, Germany        |
| PBS buffer tablets (P4417)                              | Sigma-Aldrich Chemie GmbH, Steinheim, Germany     |
| acetone (for analysis)                                  | ACROS Organics, New Jersey, USA                   |
| isopropanol (for analysis)                              | Merck kGaA, Darmstadt Germany                     |
| photoresist (Clariant PL 177)                           | Microchemicals, Ulm, Germany                      |
| developer (AZ developer)                                | Microchemicals, Ulm, Germany                      |
| adhesion promotor (TI Prime)                            | Microchemicals, Ulm, Germany                      |
| exposure unit (Aktina E)                                | Walter Lemmen Apparatebau, Kreuzwertheim, Germany |
| hydrofluoric acid (for analysis)                        | Merck kGaA, Darmstadt Germany                     |
| nitric acid (for analysis)                              | Merck kGaA, Darmstadt Germany                     |
| PDMS (Silgard 184 Kit)                                  | Dow Corning, Midland, USA                         |
| silver glue (Epo-Tek EE129-4)                           | Polytec GmbH, Waldbronn, Germany                  |
| epoxy resin (UHU plus sofortfest)                       | UHU GmbH, Bühl, Germany                           |
| tungsten probes (PH-100)                                | Süss Microtec AG, Dresden, Germany                |
| ref. electrodes (MI-402)                                | Microelectrodes Inc., Bedford, USA                |
| voltage source (E3647A)                                 | Agilent, Palo Alto, USA                           |
| voltage source with integrated amperemeter (Model 2400) | Keithley Instruments Inc., Cleveland, USA         |
| picoamperemeter (Model 6485)                            | Keithley Instruments Inc., Cleveland, USA         |
| measurement program (Labview)                           | National Instruments Corp., Austin, USA           |
